# Supplementary material for: Revealing the unusual grain growth of nanoparticles in calcination: oriented attachment in the solid state
Source: Royal Society of Chemistry journal article supplement (doi:10.1039/d1ce00187f), 2021-01-01
Supplement: d1ce00187f1.pdf [file d1ce00187f1.pdf]

## Supplementary Information

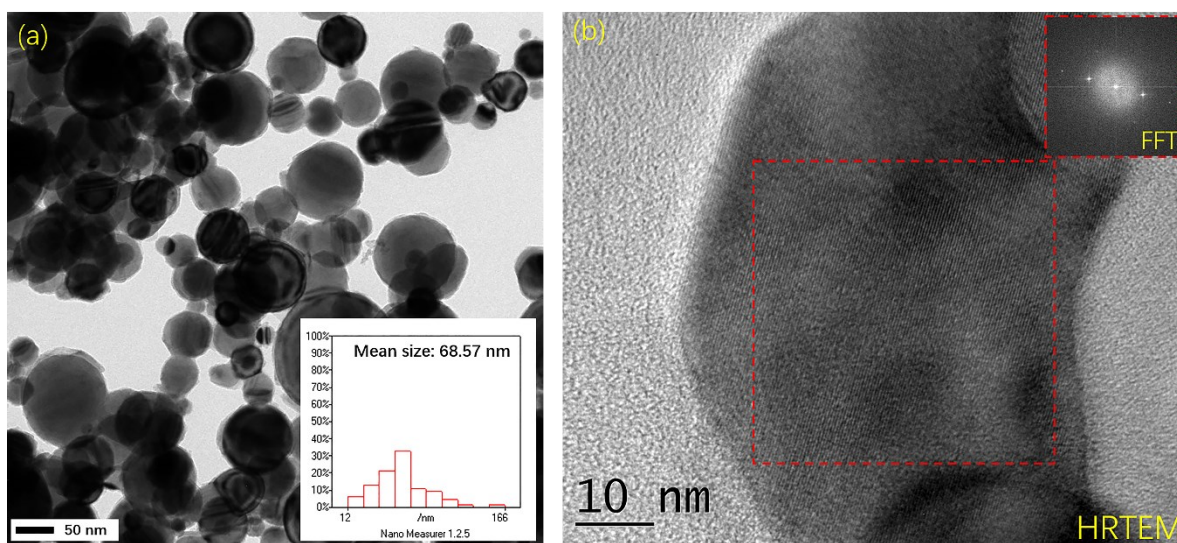

Fig. 1 (a) TEM image and grain size of the original 70 nm nickel; (b) High-resolution TEM of 70 nm nanoparticle. Inset: Fast Fourier Transform (FFT) patterns of Ni from 70 nm nanoparticle.

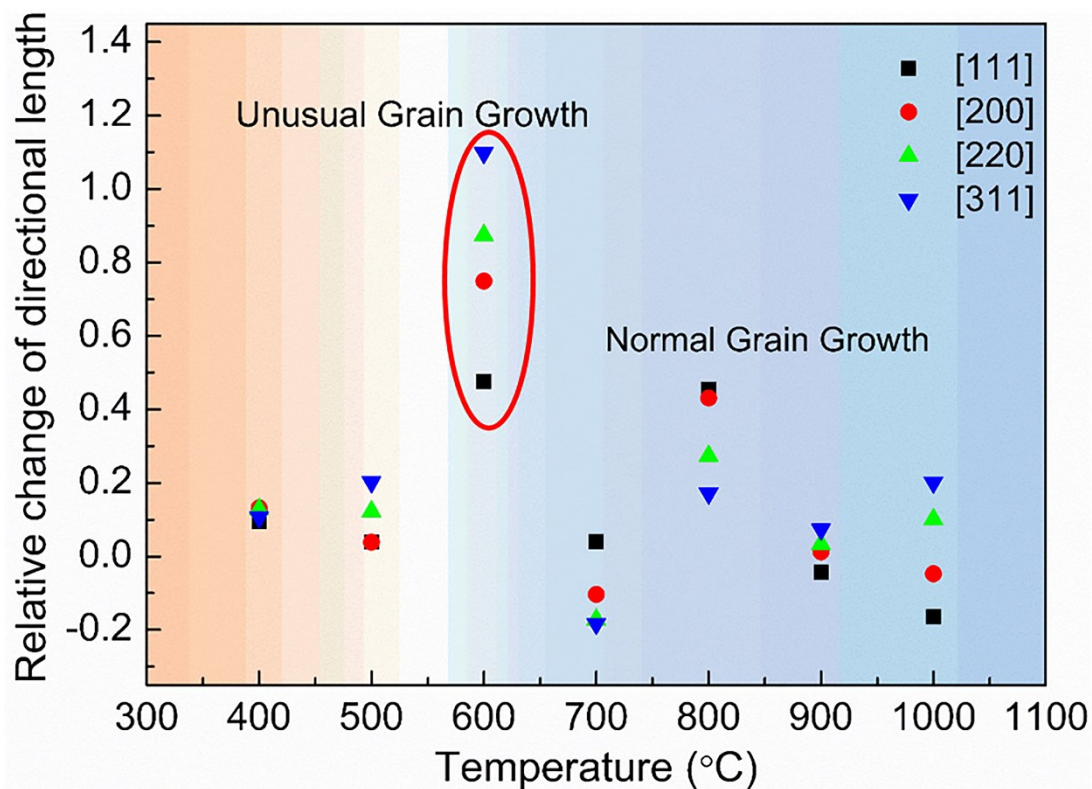

Fig. 2 The relative change of directional length along (111), (200), (220) and (311) with varying

calcination temperature. The directional changes were estimated using the fraction of crystal size increasing calculated with Scherrer equation from these planes, respectively. The reference of one data point was the data of the same plane from the sample calcined at 100 °C lower than this point. For instance, the directional change of (111) at 500 °C was  $(D_{(111), 500\text{ °C}} - D_{(111), 400\text{ °C}})/D_{(111), 400\text{ °C}}$ . As shown in this figure, the directional length change along [311] is about 110 % and about 50 % along [111], which qualitatively indicates that the nano-sized Ni growth in calcination is anisotropic.

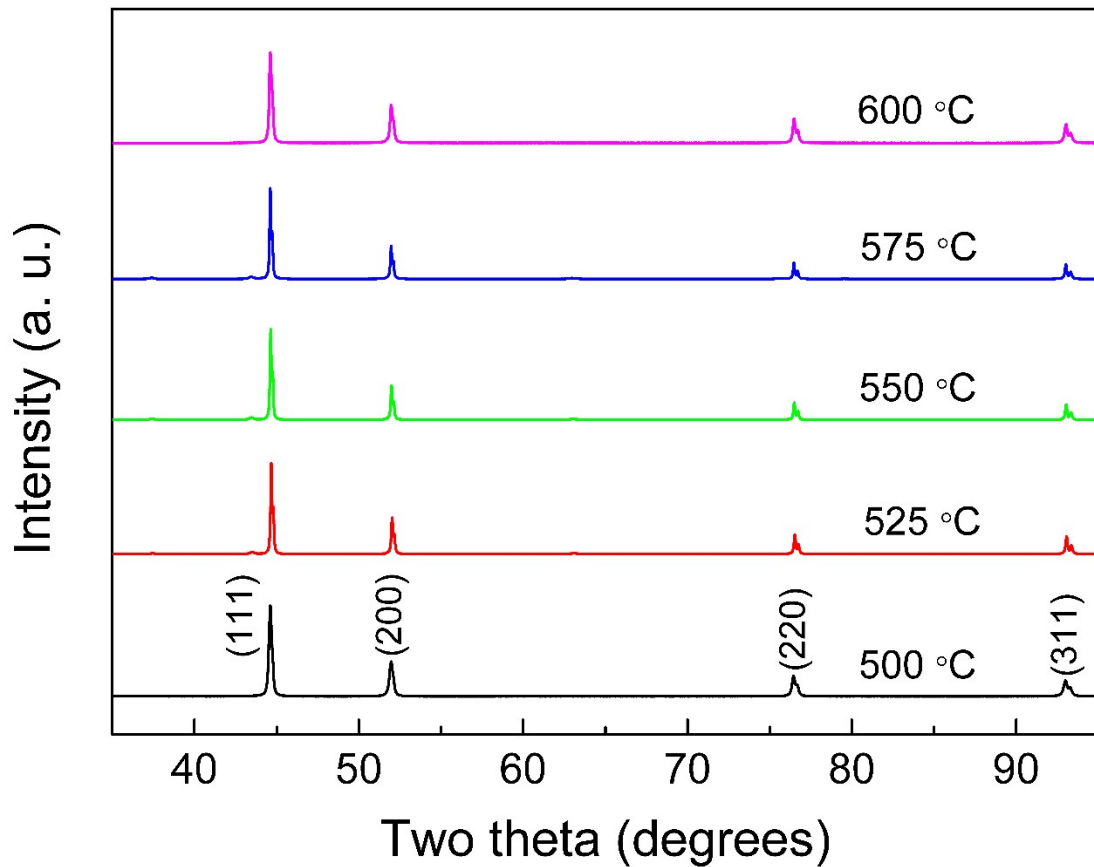

Fig.3 XRD results of the pre-pressed nickel nanoparticle disks recovered from five temperatures points (500 °C, 525 °C, 550 °C, 575 °C, 600 °C). (Point 2 by Reviewer #5)

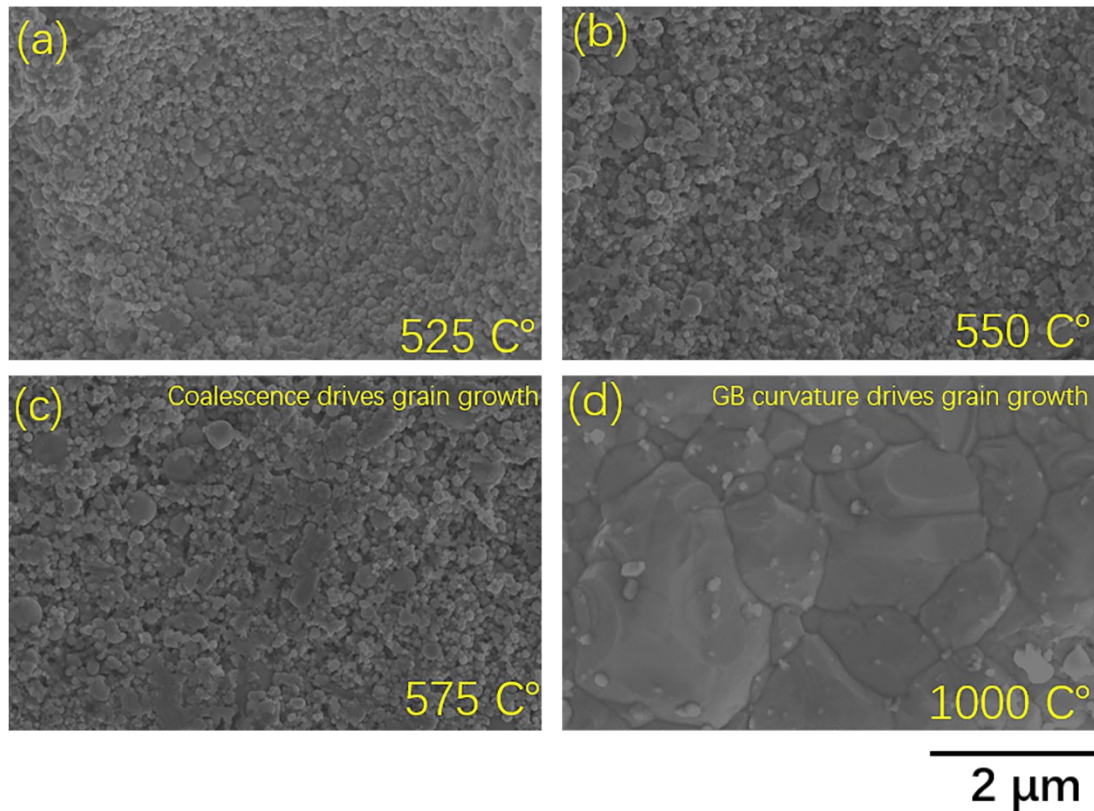

Fig. 4 SEM morphology of samples after calcined under different temperature. In the temperature range between 500 °C to 600 °C, grain start to coalesce into large clusters with increasing temperature, but in high temperature (1000 °C), grain grows mainly by GB diffusion or immigration as the grains are too large to rotate for orientation attachment, resulting into normal grain growth.

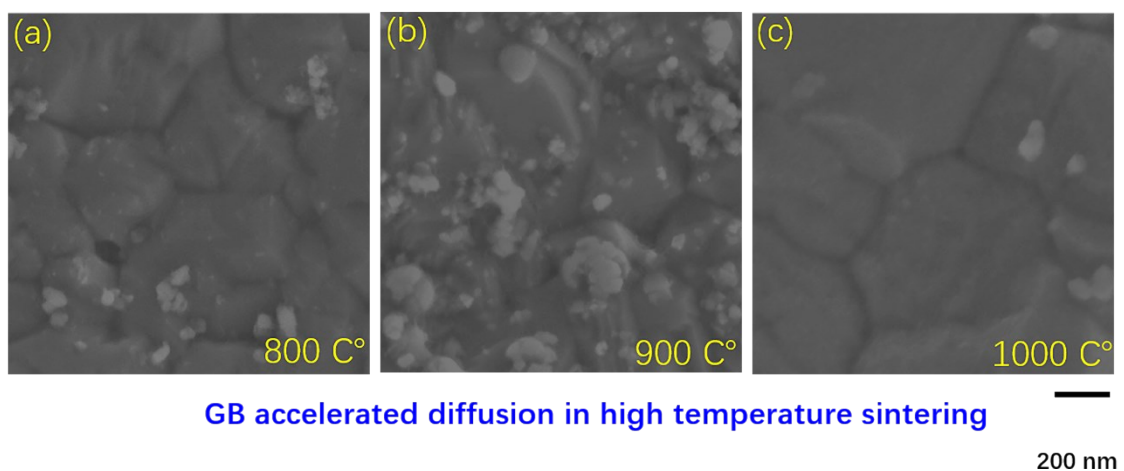

Fig. 5 SEM morphology of samples after calcined under high temperature (800 °C, 900 °C and 1000 °C).
